# Supplementary material for: Excretion of Urinary Metabolites of the Phthalate Esters DEP and DEHP in 16 Volunteers after Inhalation and Dermal Exposure
Source: PubMed Central journal article supplement (PMC6266104; doi:10.3390/ijerph15112514), 2018-11-09
Supplement: ijerph-15-02514-s001.pdf [file ijerph-15-02514-s001.pdf]

## Supplementary Information

**Table S1.** Excretion kinetics of D<sub>4</sub>-DEP metabolites.

Excretion characteristics of the urinary metabolite D<sub>4</sub>-MEP from 16 participants after exposure to D<sub>4</sub>-DEP by combined, inhalation and dermal, exposure and dermal exposure only. Characteristics include C<sub>max</sub> (maximum concentration in nmol), T<sub>max</sub> (time of maximum concentration), T<sub>1/2</sub> (excretion half-life), and AUC (area under the excretion curve). Concentrations are presented in nmol / mmol creatinine (cr), T<sub>max</sub> and T<sub>1/2</sub> are given in mid-time (mid time point of collection interval).

| DEP                 | Inhalation and dermal |                  |                  |                  |                    | Dermal               |                  |                  |                  |                    | Inhalation only<br>(inhalation and dermal)-<br>dermal) |                    |
|---------------------|-----------------------|------------------|------------------|------------------|--------------------|----------------------|------------------|------------------|------------------|--------------------|--------------------------------------------------------|--------------------|
| Subject<br>(gender) | air<br>concentration  | T <sub>max</sub> | T <sub>1/2</sub> | C <sub>max</sub> | AUC                | air<br>concentration | T <sub>max</sub> | T <sub>1/2</sub> | C <sub>max</sub> | AUC                | C <sub>max</sub>                                       | AUC                |
|                     | nmol/m <sup>3</sup>   | h                | h                | nmol/mmol<br>cr  | nmol·h<br>/mmol cr | nmol/m <sup>3</sup>  | h                | h                | nmol/mmol<br>cr  | nmol·h<br>/mmol cr | nmol<br>/mmol cr                                       | nmol·h<br>/mmol cr |
| <b>1 (F)</b>        | 1158                  | 3.5              | 2.3              | 625              | 1828               | 1224                 | 10.3             | 2.1              | 20.6             | 118                | 605                                                    | 1710               |
| <b>2 (F)</b>        | 1158                  | 3.3              | 3.1              | 604              | 1396               | 1224                 | 3.4              | 11.3             | 28.0             | 135                | 576                                                    | 1262               |
| <b>3 (F)</b>        | 1158                  | 2.6              | 0.8              | 1423             | 3437               | 1224                 | 6.3              | 1.8              | 48.0             | 245                | 1375                                                   | 3192               |
| <b>4 (F)</b>        | 1158                  | 2.3              | 4.2              | 694              | 1821               | 1224                 | 3.6              | 5.9              | 74.5             | 344                | 619                                                    | 1477               |
| <b>5 (F)</b>        | 1759                  | 3.3              | 0.9              | 444              | 1397               | 1242                 | 3.5              | 1.3              | 109              | 356                | 336                                                    | 1041               |
| <b>6 (M)</b>        | 1759                  | 3.3              | 2.5              | 182              | 493.4              | 1242                 | 3.5              | 2.1              | 10.5             | 44.6               | 172                                                    | 449.8              |
| <b>7 (F)</b>        | 1759                  | 3.5              | 2.7              | 105              | 491.8              | 1242                 | 3.7              | 2.5              | 13.0             | 60.5               | 92.2                                                   | 431.4              |
| <b>8 (M)</b>        | 1759                  | 3.6              | 1.1              | 695              | 1999               | 1242                 | 3.6              | 1.7              | 15.3             | 104                | 679                                                    | 1895               |
| <b>9 (M)</b>        | 1702                  | 3.6              | 3.9              | 681              | 3385               | 1154                 | 4.9              | 2.9              | 36.7             | 218                | 644                                                    | 3167               |
| <b>10 (F)</b>       | n.a.                  | n.a.             | n.a.             | n.a.             | n.a.               | 1154                 | 3.4              | 0.9              | 25.9             | 98.7               | n.a.                                                   | n.a.               |
| <b>11 (F)</b>       | 1702                  | 3.6              | 1.6              | 343              | 1370               | 1154                 | 4.8              | 1.6              | 7.30             | 35.5               | 336                                                    | 1334               |
| <b>12 (M)</b>       | 1702                  | 3.5              | 3.4              | 958              | 3269               | 1154                 | n.a.             | n.a.             | n.a.             | n.a.               | n.a.                                                   | n.a.               |
| <b>13 (M)</b>       | 1268                  | 3.8              | 0.9              | 166              | 732.8              | 1154                 | 3.5              | 0.7              | 33.9             | 158                | 133                                                    | 575                |
| <b>14 (M)</b>       | 1268                  | 4.9              | 1.1              | 489              | 1820               | n.a.                 | n.a.             | n.a.             | n.a.             | n.a.               | n.a.                                                   | n.a.               |
| <b>15 (F)</b>       | 1268                  | 1.6              | 1.3              | 218              | 933.2              | 1631                 | 3.8              | 1.0              | 36.9             | 216                | 181                                                    | 716.8              |
| <b>16 (M)</b>       | 1268                  | 3.7              | 2.1              | 68.4             | 257.2              | 1631                 | 6.2              | 1.6              | 20.3             | 59.3               | 48.1                                                   | 197.8              |
| <b>Mean</b>         | <b>1456</b>           | <b>3.3</b>       | <b>2.1</b>       | <b>513</b>       | <b>1642</b>        | <b>1260</b>          | <b>4.6</b>       | <b>2.7</b>       | <b>34.3</b>      | <b>157</b>         | <b>446</b>                                             | <b>1342</b>        |
| <b>SD</b>           | 273.1                 | 0.7              | 1.1              | 364              | 1043               | 155.4                | 1.9              | 2.8              | 27.7             | 105                | 363                                                    | 967.2              |
| <b>CV(%)</b>        | 19                    | 22               | 54               | 71               | 63                 | 12                   | 42               | 105              | 81               | 67                 | 81                                                     | 72                 |

**Table S2.** Excretion kinetics of D<sub>4</sub>-DEHP metabolites

Excretion characteristics of the five urinary metabolites D<sub>4</sub>-MEHP, D<sub>4</sub>-5OH-MEHP, D<sub>4</sub>-5oxo-MEHP, D<sub>4</sub>-5cx-MEPP and D<sub>4</sub>-2cx-MMHP from 16 participants after exposure to D<sub>4</sub>-DEHP by inhalation exposure. Characteristics include C<sub>max</sub> (maximum concentration in nmol), T<sub>max</sub> (time of maximum concentration), T<sub>1/2</sub> (excretion half-life), and AUC (area under the excretion curve). Concentrations are presented in nmol / mmol creatinine (cr), T<sub>max</sub> and T<sub>1/2</sub> are given in mid-time (mid time point of collection interval)

| DEHP Inhalation     |                         |                  |                  |                  |                    |                      |                  |                          |                  |                           |                  |                          |                  |                          |                  |
|---------------------|-------------------------|------------------|------------------|------------------|--------------------|----------------------|------------------|--------------------------|------------------|---------------------------|------------------|--------------------------|------------------|--------------------------|------------------|
| Subject<br>(gender) | air<br>conc.            | all metabolites  |                  |                  |                    | D <sub>4</sub> -MEHP |                  | D <sub>4</sub> -5OH-MEPP |                  | D <sub>4</sub> -5oxo-MEPP |                  | D <sub>4</sub> -5cx-MEPP |                  | D <sub>4</sub> -2cx-MMHP |                  |
|                     |                         | T <sub>max</sub> | T <sub>1/2</sub> | C <sub>max</sub> | AUC                | T <sub>max</sub>     | C <sub>max</sub> | T <sub>max</sub>         | C <sub>max</sub> | T <sub>max</sub>          | C <sub>max</sub> | T <sub>max</sub>         | C <sub>max</sub> | T <sub>max</sub>         | C <sub>max</sub> |
|                     | nmol/<br>m <sup>3</sup> | h                | h                | nmol<br>/mmol cr | nmol·h<br>/mmol cr | nmol                 | nmol<br>/mmol cr | nmol                     | nmol<br>/mmol cr | nmol                      | nmol<br>/mmol cr | nmol                     | nmol<br>/mmol cr | nmol                     | nmol<br>/mmol cr |
| 1 (F)               | 319                     | 1.5              | 11               | 13.5             | 98.5               | 1.5                  | 7.8              | 3.5                      | 1.4              | 5.7                       | 3.2              | 5.7                      | 3.4              | 5.7                      | 0.6              |
| 2 (F)               | 319                     | 3.4              | 2.2              | 17.5             | 120                | 3.4                  | 5.8              | 3.4                      | 3.9              | 3.4                       | 3.5              | 3.4                      | 5.0              | 4.5                      | 0.4              |
| 3 (F)               | 319                     | 2.4              | 9.1              | 141              | 370                | 2.4                  | 18               | 2.4                      | 43               | 2.4                       | 37               | 2.4                      | 38               | 2.4                      | 4.4              |
| 4 (F)               | 319                     | n.d.             | n.d.             | n.d.             | n.d.               | n.d.                 | n.d.             | n.d.                     | n.d.             | n.d.                      | n.d.             | n.d.                     | n.d.             | n.d.                     | n.d.             |
| 5 (F)               | 327                     | 3.6              | 1.5              | 51.4             | 210                | 3.6                  | 11               | 3.6                      | 16               | 3.6                       | 14               | 3.6                      | 9.6              | 3.6                      | 1.7              |
| 6 (M)               | 327                     | 10               | 3.0              | 2.50             | 22.2               | n.d.                 | n.d.             | 10                       | 1.0              | 10                        | 0.7              | 10                       | 0.7              | 10                       | 0.1              |
| 7 (F)               | 367                     | 14               | 1.1              | 30.4             | 173                | 14                   | 7.6              | 14                       | 7.3              | 14                        | 5.0              | 14                       | 9.0              | 14                       | 1.5              |
| 8 (M)               | 367                     | n.d.             | n.d.             | n.d.             | n.d.               | n.d.                 | n.d.             | n.d.                     | n.d.             | n.d.                      | n.d.             | n.d.                     | n.d.             | n.d.                     | n.d.             |
| 9 (M)               | 223                     | 3.7              | 1.5              | 19.7             | 72.8               | 3.7                  | 7.7              | 3.7                      | 4.5              | 3.7                       | 3.4              | 3.7                      | 4.0              | 3.7                      | 0.2              |
| 10 (F)              | 223                     | 3.6              | 5.6              | 12.6             | 57.6               | 3.6                  | 1.7              | 3.6                      | 4.2              | 3.6                       | 3.9              | 3.6                      | 2.6              | 3.6                      | 0.2              |
| 11 (F)              | 223                     | 4.6              | 4.6              | 7.40             | 43.4               | n.d.                 | n.d.             | 4.6                      | 2.6              | 4.6                       | 2.6              | 3.8                      | 3.1              | 6.1                      | 0.2              |
| 12 (M)              | 223                     | 3.9              | 4.7              | 13.3             | 70.9               | 3.9                  | 2.3              | 3.9                      | 3.8              | 3.9                       | 3.5              | 3.9                      | 3.5              | 8.4                      | 0.3              |
| 13 (M)              | 324                     | 3.7              | 5.6              | 11.0             | 86.7               | 1.6                  | 3.6              | 3.7                      | 3.4              | 3.7                       | 3.5              | 3.7                      | 4.0              | 8.7                      | 0.3              |
| 14 (M)              | 324                     | 3.7              | 0.6              | 24.9             | 130                | 3.7                  | 13               | 3.7                      | 4.0              | 3.7                       | 2.9              | 3.7                      | 4.4              | 4.9                      | 0.4              |
| 15 (F)              | 324                     | 3.6              | 10               | 22.2             | 119                | 3.6                  | 8.9              | 3.6                      | 5.1              | 3.6                       | 3.9              | 3.6                      | 3.9              | 7.8                      | 0.6              |
| 16 (M)              | 367                     | 4.1              | 5.6              | 16.5             | 116                | 4.1                  | 10.2             | 6.4                      | 2.0              | 6.4                       | 1.3              | 4.1                      | 3.1              | 6.4                      | 0.5              |
| <b>Mean</b>         | <b>306</b>              | <b>4.7</b>       | <b>4.8</b>       | <b>27.4</b>      | <b>121</b>         | <b>4.1</b>           | <b>8.2</b>       | <b>5.0</b>               | <b>7.3</b>       | <b>5.2</b>                | <b>6.3</b>       | <b>4.9</b>               | <b>3.1</b>       | <b>6.4</b>               | <b>0.8</b>       |
| <b>SD</b>           | 52.6                    | 3.2              | 3.5              | 34.6             | 87.3               | 3.2                  | 4.7              | 3.1                      | 11               | 3.1                       | 9.4              | 3.1                      | 1.2              | 3.1                      | 1.1              |
| <b>CV(%)</b>        | 17                      | 69               | 73               | 126              | 72                 | 78                   | 57               | 63                       | 149              | 60                        | 149              | 63                       | 38               | 48                       | 140              |

**Table S3.** Total excreted dose after inhalation exposure to D<sub>4</sub>-DEP and D<sub>4</sub>-DEHP.

Excreted metabolite levels (in nmol) after inhalation given as cumulative amounts (nmol), as well as cumulative amounts normalized per total lung dose or air concentration. Lung available dose for D<sub>4</sub>-DEP was estimated to 100% and for D<sub>4</sub>-DEHP to 26 %.

|                  |             | DEP inhalation only |                 |                            |                                      |                                |                                       | DEHP inhalation only  |                 |                           |                                      |                                |                                       |
|------------------|-------------|---------------------|-----------------|----------------------------|--------------------------------------|--------------------------------|---------------------------------------|-----------------------|-----------------|---------------------------|--------------------------------------|--------------------------------|---------------------------------------|
| Subject (gender) | weight (kg) | air conc.           | total lung dose | available lung dose (100%) | cumulative amount metabolites (nmol) | cumulative amount / dose lungs | cumulative amount / air concentration | air conc.             | total lung dose | available lung dose (26%) | cumulative amount metabolites (nmol) | cumulative amount / dose lungs | cumulative amount / air concentration |
|                  |             | nmol/m <sup>3</sup> | nmol            | nmol                       | Nmol                                 | nmol / nmol dose               | nmol / nmol/m <sup>3</sup>            | nmol / m <sup>3</sup> | nmol            | nmol                      | nmol                                 | nmol                           | nmol / nmol dose                      |
| 1 (F)            | 73          | 1158                | 1096            | 1096                       | 1461                                 | 1.334                          | 1.262                                 | 319                   | 302             | 78.5                      | 46.0                                 | 0.589                          | 0.144                                 |
| 2 (F)            | 60          | 1158                | 900.4           | 900.4                      | 904.2                                | 1.004                          | 0.781                                 | 319                   | 248             | 64.6                      | 79.0                                 | 1.229                          | 0.247                                 |
| 3 (F)            | 73          | 1158                | 1096            | 1096                       | 2722                                 | 2.485                          | 2.351                                 | 319                   | 302             | 78.5                      | 353                                  | 5.388                          | 1.105                                 |
| 4 (F)            | 61          | 1158                | 915.0           | 915.0                      | 1274                                 | 1.392                          | 1.100                                 | 319                   | 252             | 65.6                      | 23.0                                 | 0.346                          | 0.072                                 |
| 5 (F)            | 64          | 1759                | 1460            | 1460                       | 806.4                                | 0.552                          | 0.458                                 | 327                   | 271             | 70.5                      | 139                                  | 1.971                          | 0.425                                 |
| 6 (M)            | 132         | 1759                | 3008            | 3008                       | 250.8                                | 0.083                          | 0.143                                 | 327                   | 559             | 145                       | 8.0                                  | 0.058                          | 0.024                                 |
| 7 (F)            | 82          | 1759                | 1868            | 1868                       | 247.8                                | 0.133                          | 0.141                                 | 367                   | 390             | 101                       | 53.0                                 | 0.852                          | 0.144                                 |
| 8 (M)            | 78          | 1759                | 1779            | 1779                       | 1324                                 | 0.744                          | 0.753                                 | 367                   | 372             | 96.7                      | n.d.                                 | n.d                            | n.d                                   |
| 9 (M)            | 85          | 1702                | 1874            | 1874                       | 2602                                 | 1.388                          | 1.529                                 | 223                   | 246             | 63.9                      | 86.0                                 | 0.830                          | 0.386                                 |
| 10 (F)           | 85          | n.d.                | n.d             | n.d                        | n.d                                  | n.d.                           | n.d.                                  | 223                   | 246             | 63.9                      | 33.0                                 | 0.524                          | 0.148                                 |
| 11 (F)           | 87          | 1702                | 1917            | 1917                       | 854.6                                | 0.446                          | 0.502                                 | 223                   | 251             | 65.3                      | 28.0                                 | 0.427                          | 0.126                                 |
| 12 (M)           | 68          | 1702                | 1501            | 1501                       | 2316                                 | 1.543                          | 1.361                                 | 223                   | 197             | 51.1                      | 45.0                                 | 0.873                          | 0.202                                 |
| 13 (M)           | 82          | 1268                | 1347            | 1347                       | 329.6                                | 0.245                          | 0.260                                 | 324                   | 345             | 89.6                      | 49.0                                 | 0.545                          | 0.151                                 |
| 14 (M)           | 93          | 1268                | 1530            | 1530                       | n.d                                  | n.d.                           | n.d.                                  | 324                   | 391             | 102                       | 105                                  | 1.031                          | 0.324                                 |
| 15 (F)           | 74          | 1268                | 1217            | 1217                       | 471.0                                | 0.387                          | 0.371                                 | 324                   | 311             | 80.9                      | 77.0                                 | 0.290                          | 0.237                                 |
| 16 (M)           | 80          | 1268                | 1315            | 1315                       | 70.05                                | 0.053                          | 0.055                                 | 367                   | 381             | 99.1                      | 96.0                                 | 0.968                          | 0.261                                 |
| <b>Mean</b>      | <b>80</b>   | <b>1456</b>         | <b>1522</b>     | <b>1522</b>                | <b>1117</b>                          | <b>0.842</b>                   | <b>0.790</b>                          | <b>306</b>            | <b>317</b>      | <b>82.3</b>               | <b>81.3</b>                          | <b>0.995</b>                   | <b>0.266</b>                          |
| <b>SD</b>        | 17          | 273.1               | 532.1           | 532.1                      | 888.2                                | 0.711                          | 0.660                                 | 52.6                  | 88.6            | 23.0                      | 82.9                                 | 1.282                          | 0.257                                 |
| <b>CV(%)</b>     | 21          | 19                  | 35              | 35                         | 80                                   | 84                             | 83                                    | 17                    | 28              | 28                        | 102                                  | 129                            | 96                                    |

**Table S4.** Total excreted dose after combined inhalation and dermal and dermal exposure to D<sub>4</sub>-DEP.

Excreted metabolite levels (in nmol) after combined, inhalation and dermal, exposure to D<sub>4</sub>-DEP, as well as dermal exposure to D<sub>4</sub>-DEP only. Values are given as cumulative amounts (nmol), and cumulative amounts normalized per total air concentration.

| DEP                 |                | Inhalation and dermal |                       |                                     |                                             | Dermal              |                       |                                     |                                             | Inhalation only<br>(inhalation and dermal) - (dermal)) |                       |                                     |                                             |
|---------------------|----------------|-----------------------|-----------------------|-------------------------------------|---------------------------------------------|---------------------|-----------------------|-------------------------------------|---------------------------------------------|--------------------------------------------------------|-----------------------|-------------------------------------|---------------------------------------------|
| Subject<br>(gender) | weight<br>(kg) | air conc.             | total<br>lung<br>dose | cumulative<br>amount<br>metabolites | cumulative<br>amount / air<br>concentration | air conc.           | total<br>lung<br>dose | cumulative<br>amount<br>metabolites | cumulative<br>amount / air<br>concentration | air conc.                                              | total<br>lung<br>dose | cumulative<br>amount<br>metabolites | cumulative<br>amount / air<br>concentration |
|                     |                | nmol/m <sup>3</sup>   | nmol                  | nmol                                | nmol /<br>nmol/m <sup>3</sup>               | nmol/m <sup>3</sup> | nmol                  | nmol                                | nmol /<br>nmol/m <sup>3</sup>               | nmol/m <sup>3</sup>                                    | nmol                  | Nmol                                | nmol /<br>nmol/m <sup>3</sup>               |
| 1 (F)               | 73             | 1158                  | 1096                  | 1538                                | 1.328                                       | 1224                | -                     | 76.7                                | 0.063                                       | 1158                                                   | 1096                  | 1461                                | 1.262                                       |
| 2 (F)               | 60             | 1158                  | 900.4                 | 998.4                               | 0.862                                       | 1224                | -                     | 94.2                                | 0.077                                       | 1158                                                   | 900.4                 | 904.2                               | 0.781                                       |
| 3 (F)               | 73             | 1158                  | 1096                  | 2980                                | 2.573                                       | 1224                | -                     | 258                                 | 0.211                                       | 1158                                                   | 1096                  | 2722                                | 2.351                                       |
| 4 (F)               | 61             | 1158                  | 915.0                 | 1547                                | 1.336                                       | 1224                | -                     | 274                                 | 0.223                                       | 1158                                                   | 915.0                 | 1274                                | 1.100                                       |
| 5 (F)               | 64             | 1759                  | 1460                  | 1030                                | 0.586                                       | 1242                | -                     | 224                                 | 0.180                                       | 1759                                                   | 1460                  | 806.4                               | 0.458                                       |
| 6 (M)               | 132            | 1759                  | 3008                  | 272.3                               | 0.155                                       | 1242                | -                     | 21.5                                | 0.017                                       | 1759                                                   | 3008                  | 250.8                               | 0.143                                       |
| 7 (F)               | 82             | 1759                  | 1868                  | 277.1                               | 0.158                                       | 1242                | -                     | 29.3                                | 0.024                                       | 1759                                                   | 1868                  | 247.8                               | 0.141                                       |
| 8 (M)               | 78             | 1759                  | 1779                  | 1391                                | 0.791                                       | 1242                | -                     | 67.5                                | 0.054                                       | 1759                                                   | 1779                  | 1324                                | 0.753                                       |
| 9 (M)               | 85             | 1702                  | 1874                  | 2766                                | 1.626                                       | 1154                | -                     | 164                                 | 0.142                                       | 1702                                                   | 1874                  | 2602                                | 1.529                                       |
| 10 (F)              | 85             | n.a.                  | n.d                   | n.d                                 | n.d                                         | 1154                | -                     | 62.6                                | 0.054                                       | n.a.                                                   | n.d                   | n.d                                 | n.d                                         |
| 11 (F)              | 87             | 1702                  | 1917                  | 875.9                               | 0.515                                       | 1154                | -                     | 21.2                                | 0.018                                       | 1702                                                   | 1917                  | 854.6                               | 0.502                                       |
| 12 (M)              | 68             | 1702                  | 1501                  | 2484                                | 1.460                                       | 1154                | -                     | 169                                 | 0.146                                       | 1702                                                   | 1501                  | 2316                                | 1.361                                       |
| 13 (M)              | 82             | 1268                  | 1347                  | 450.9                               | 0.355                                       | 1154                | -                     | 121                                 | 0.074                                       | 1268                                                   | 1347                  | 329.6                               | 0.260                                       |
| 14 (M)              | 93             | 1268                  | 1530                  | 1295                                | 1.021                                       | n.d.                | -                     | n.d.                                | n.d.                                        | 1268                                                   | 1530                  | n.d                                 | n.d                                         |
| 15 (F)              | 74             | 1268                  | 1217                  | 600.2                               | 0.473                                       | 1631                | -                     | 129                                 | 0.079                                       | 1268                                                   | 1217                  | 471.0                               | 0.371                                       |
| 16 (M)              | 80             | 1268                  | 1315                  | 139.4                               | 0.110                                       | 1631                | -                     | 69.3                                | 0.043                                       | 1268                                                   | 1315                  | 70.05                               | 0.055                                       |
| <b>Mean</b>         | <b>80</b>      | <b>1456</b>           | <b>1522</b>           | <b>1243</b>                         | <b>0.890</b>                                | <b>1260</b>         |                       | <b>119</b>                          | <b>0.094</b>                                | <b>1456</b>                                            | <b>1522</b>           | <b>1117</b>                         | <b>0.790</b>                                |
| <b>SD</b>           | 17             | 273.1                 | 532.1                 | 904.6                               | 0.681                                       | 155.4               |                       | 83.0                                | 0.069                                       | 273.1                                                  | 532.1                 | 888.2                               | 0.660                                       |
| <b>CV(%)</b>        | 21             | 19                    | 35                    | 73                                  | 77                                          | 12                  |                       | 70                                  | 74                                          | 19                                                     | 35                    | 80                                  | 83                                          |

**Table S5.** Analytical details for quantification of phthalate esters using GC-MS/MS.

Retention time (RT), quantitative and qualitative ion transition, collision energies (CE), limit of detection (LOD) and limit of quantification (LOQ), as well as quality controls (QC) at 200 ng/mL ( $n = 10$ ), 500 ng/mL ( $n = 10$ ), 1000 ng/mL ( $n = 10$ ) and coefficient of variation (CV).

| Compound                                           | RT   | Transition Quant | CE (eV) | Transition Qual | CE (eV) | LOD (ng/mL [pmol/mL]) | LOQ ng/mL [pmol/mL] | QC 200 ng/mL  | QC 500 ng/mL  | QC 1000 ng/mL  |
|----------------------------------------------------|------|------------------|---------|-----------------|---------|-----------------------|---------------------|---------------|---------------|----------------|
| D <sub>4</sub> -DEP                                | 5.24 | 153 -> 69        | 30      | 153 -> 97       | 20      | 1.0 [4.4]             | 3.4 [15.0]          | 295 (CV 9.5%) | 486 (CV 5.8%) | 1021 (CV 4.7%) |
| D <sub>4</sub> -DEHP                               | 9.89 | 153 -> 69        | 25      | 153 -> 97       | 20      | 4.7 [11.9]            | 15.8 [40.0]         | 268 (CV 5.8%) | 497 (CV 7.0%) | 1005 (CV 3.3%) |
| <sup>13</sup> C <sub>6</sub> -D <sub>4</sub> -DEP  | 5.22 | 159 -> 74        | 25      |                 |         |                       |                     |               |               |                |
| <sup>13</sup> C <sub>6</sub> -D <sub>4</sub> -DEHP | 9.87 | 159 -> 74        | 20      |                 |         |                       |                     |               |               |                |

**Table S6.** Analytical details for quantification of phthalate metabolites using LC-MS/MS.

Retention time (RT), quantitative MRM transitions, collision energies (CE), limit of detection (LOD) and limit of quantification (LOQ); quality controls at 8 ng/mL ( $n = 10$ ) and 80 ng/mL ( $n = 10$ ) and coefficient of variation (CV).

| Compound                  | RT   | Transition     | CE (eV) | Internal standards       | RT   | Transition     | CE (eV) | LOD ng/mL [pmol/mL] | LOQ ng/mL [pmol/mL] | QC 8 ng/mL   | QC 80 ng/mL   |
|---------------------------|------|----------------|---------|--------------------------|------|----------------|---------|---------------------|---------------------|--------------|---------------|
| D <sub>4</sub> -MEP       | 4.56 | 197.1-> 81.0   | 22      | D <sub>9</sub> -MEP      | 4.18 | 202.1 -> 86.0  | 22      | 0.5 [2.5]           | 1.7 [8.5]           | 9.6 (CV 36%) | 82.1 (CV 22%) |
| D <sub>4</sub> -MEHP      | 5.61 | 281.3-> 136.8  | 22      | D <sub>4</sub> -9cx-MEPP | 4.74 | 316.1 -> 125.0 | 34      | 0.9 [3.3]           | 2.8 [9.9]           | 7.1 (CV 51%) | 55.2 (CV 56%) |
| D <sub>4</sub> -5OH-MEHP  | 4.89 | 297.1-> 125.0  | 24      | D <sub>4</sub> -9cx-MEPP | 4.74 | 316.1 -> 125.0 | 34      | 0.1 [0.3]           | 0.5 [1.7]           | 6.6 (CV 47%) | 63.5 (CV 57%) |
| D <sub>4</sub> -5oxo-MEHP | 4.93 | 295.1-> 125.0  | 24      | D <sub>4</sub> -9cx-MEPP | 4.74 | 316.1 -> 125.0 | 34      | 0.2 [0.6]           | 0.6 [2.0]           | 9.8 (CV 56%) | 78.8 (CV 53%) |
| D <sub>4</sub> -5cx-MEPP  | 4.76 | 311.2 -> 159.2 | 19      | D <sub>4</sub> -9cx-MEPP | 4.74 | 316.1 -> 125.0 | 34      | 0.1 [0.3]           | 0.4 [1.2]           | 9.8 (CV 47%) | 79.2 (CV 58%) |
| D <sub>4</sub> -2cx-MEPP  | 4.78 | 311.2 -> 159.2 | 19      | D <sub>4</sub> -9cx-MEPP | 4.74 | 316.1 -> 125.0 | 34      | 0.1 [0.3]           | 0.5 [1.6]           | 5.3 (CV 55%) | 84.8 (CV 72%) |

## GC-MS/MS—Method details

*Suppl. Table 5* shows the quantifier ions and qualifier ions, retention times and collision energies for D<sub>4</sub>-DEP and D<sub>4</sub>-DEHP and internal standards. All runs included at least 10 blank samples and three unused tenax tubes were extracted and analyzed for background contamination that was subtracted from all values. All samples from one individual exposure scenario were analyzed in the same run. The specificity was tested by analyzing extracted blank tenax tubes spiked with internal standard. Excellent linearity was seen for the calibration standards ranging from 50 to 1000 ng/mL in toluene. The correlation coefficient ( $r^2$ ) observed for D<sub>4</sub>-DEP was above 0.983 and D<sub>4</sub>-DEHP was above 0.973. LOD and LOQ were determined by analysis of 10 different blank toluene samples spiked with internal standard. The LOD was calculated as three times the standard deviation of the ratio between the peak area at the analyte retention time and the peak area of internal standard, divided by the slope of the calibration line. The LOQ was similarly determined as 9 times the standard deviation of the ratios. The determined LOD ranged from 1.2 ng/mL (D<sub>4</sub>-DEP) to 5.5 (D<sub>4</sub>-DEHP) ng/mL, and LOQ values were in between 4.0 (D<sub>4</sub>-DEP) and 18.3 ng/mL (D<sub>4</sub>-DEHP) (Table S5). The within-run precision of the method was determined by analyses of 10 toluene samples spiked with 200, 500 and 1000 ng/mL of D<sub>4</sub>-DEHP or D<sub>4</sub>-DEP, respectively. The CV at the three concentration levels of the analyzed compounds was below 10% (Table S5). The between-run precision was determined by incorporating three QC samples in duplicates in every analytical batch. The mean quantified values at the three concentration levels (200, 500, 1000 ng/mL) were 268, 497 and 1005 ng/mL for D<sub>4</sub>-DEHP and 295, 486, and 1021 ng/mL for D<sub>4</sub>-DEP (Table S5).

## LC-MS/MS—Method details

*Suppl. Table 6* presents the ion transitions for all quantified phthalate metabolites and internal standards, as well as collision energies and retention times. All runs included at least 10 blank samples, and background contamination was subtracted from all values. Excellent linearity was seen for the calibration standards ranging from 0 to 1000 ng/mL in acetonitrile/water (50:50). The correlation coefficient ( $r^2$ ) observed was above 0.990 (D<sub>4</sub>-MEP), 0.993 (D<sub>4</sub>-MEHP), 0.980 (D<sub>4</sub>-5OH-MEHP, D<sub>4</sub>-5oxo-MEHP, D<sub>4</sub>-5cxMEPP) and 0.900 (D<sub>4</sub>-2cxMMHP). LOD and LOQ were determined by analysis of 10 different blank toluene samples spiked with internal standard. The LOD was calculated as three times the standard deviation of the ratio between the peak area at the analyte retention time and the peak area of internal standard, divided by the slope of the calibration line. The LOQ was similarly determined as 10 times the standard deviation of the ratios. The determined LOD for all analysed metabolites were: 0.5 ng/mL (D<sub>4</sub>-MEP), 0.9 ng/mL (D<sub>4</sub>-MEHP), 0.1 ng/mL (D<sub>4</sub>-5OH-MEHP), 0.2 ng/mL (D<sub>4</sub>-5oxo-MEHP), 0.1 ng/mL (D<sub>4</sub>-5cx-MEPP), 0.1 ng/mL (D<sub>4</sub>-2cx-MMHP) (Table S6). The within-run precision of the method was determined by replicate analyses of 10 urine samples spiked with 8 and 80 ng/mL of D<sub>4</sub>-labelled metabolite standards, with a CV below 10% (Table S6). The between-run precision was determined by incorporating two QC samples in duplicates in every analytical batch. The mean quantified values at the two concentration levels (8 and 80 ng/mL) were 82.1 ng/mL (D<sub>4</sub>-MEP), 67.4 ng/mL (D<sub>4</sub>-MEHP), 73.9 ng/mL (D<sub>4</sub>-5OH-MEPP), 73.2 ng/mL (D<sub>4</sub>-5oxo-MEHP), 74.8 ng/mL (D<sub>4</sub>-5cx-MEPP) and 71.1 ng/mL (D<sub>4</sub>-2cx-MMHP) (Table S6).
